# Supplementary material for: A Scoping Review of Income Support Programs Offered to Older Adults Living in South Asian Countries between 2000 and 2021
Source: Hindawi journal article supplement (doi:10.1155/2024/1711756), 2024-01-01
Supplement: f1 [file 1711756.f1.zip]

Archive with 2 entries (2 files):
- Research Checklist_PRISMA ScR_revised.docx
- Supplementary file 1_ISP_revised.pdf
