# Supplementary material for: A Scoping Review of Income Support Programs Offered to Older Adults Living in South Asian Countries between 2000 and 2021
Source: Hindawi journal article supplement (doi:10.1155/2024/1711756), 2024-01-01
Supplement: f1 [file 1711756.f1.zip › Supplementary file 1_ISP_revised.pdf]

## Supplementary File

### 1. Search Strategy

((((((((((((((((((((((("aged"[MeSH Terms]) OR ("middle aged"[MeSH Terms])) OR ("frail elderly"[MeSH Terms])) OR (aged[Title/Abstract])) OR ("middle-aged"[Title/Abstract])) OR ("middle aged"[Title/Abstract])) OR (geriatric[Title/Abstract])) OR (aging[Title/Abstract])) OR (ageing[Title/Abstract])) OR ("elderly citizens"[Title/Abstract])) OR ("elderly people"[Title/Abstract])) OR (senile[Title/Abstract])) OR (senility[Title/Abstract])) OR ("old age"[Title/Abstract])) OR ("elder people"[Title/Abstract])) OR ("elder individuals"[Title/Abstract])) OR ("older age group"[Title/Abstract])) OR ("older population"[Title/Abstract])) OR ("elderly people"[Title/Abstract])) OR ("senior citizen\*" [Title/Abstract])) OR ("elder\*" [Title/Abstract])) OR ("older adult\*" [Title/Abstract])) OR (frail[Title/Abstract])) OR ("old person"[Title/Abstract])) AND (((((((((((((((((((((((("old age assistance"[MeSH Terms]) OR ("pensions"[MeSH Terms])) OR ("government programs"[MeSH Terms])) OR ("financing, government"[MeSH Terms])) OR ("income support program\*" [Title/Abstract])) OR ("income subsid\*" [Title/Abstract])) OR ("old age pension\*" [Title/Abstract])) OR ("old-age pension\*" [Title/Abstract])) OR ("old age assistance"[Title/Abstract])) OR ("old-age assistance"[Title/Abstract])) OR (pension\* [Title/Abstract])) OR ("pension scheme\*" [Title/Abstract])) OR ("social pension"[Title/Abstract])) OR ("old age allowance"[Title/Abstract])) OR ("old-age allowance\*" [Title/Abstract])) OR ("supplemental income program\*" [Title/Abstract])) OR ("old age benefit\*" [Title/Abstract])) OR ("old-age benefit\*" [Title/Abstract])) OR ("social security system\*" [Title/Abstract])) OR ("economic security"[Title/Abstract])) OR ("welfare program\*" [Title/Abstract])) OR ("government program\*" [Title/Abstract])) OR ("old age security"[Title/Abstract])) OR ("old-age security"[Title/Abstract])) ) OR ("public pension"[Title/Abstract])) AND (((((((((((((((((((((((("asia, western"[MeSH Terms]) OR ("developing countries"[MeSH Terms])) OR ("india"[MeSH Terms])) OR ("bangladesh"[MeSH Terms])) OR ("nepal"[MeSH Terms])) OR ("sri lanka"[MeSH Terms])) OR ("afghanistan"[MeSH Terms])) OR ("pakistan"[MeSH Terms])) OR ("bhutan"[MeSH Terms])) OR ("indian ocean islands"[MeSH Terms])) OR ("South Asia"[Title/Abstract])) OR ("South-Asia"[Title/Abstract])) OR ("Indian subcontinent"[Title/Abstract])) OR ("Indian sub-continent"[Title/Abstract])) OR ("developing countr\*" [Title/Abstract])) OR ("South Asian countr\*" [Title/Abstract])) OR ("low-income countr\*" [Title/Abstract])) OR ("low middle-income countr\*" [Title/Abstract])) OR ("resource-poor countr\*" [Title/Abstract])) OR (India[Title/Abstract])) OR (Bangladesh[Title/Abstract])) OR (Bhutan[Title/Abstract])) OR (Pakistan[Title/Abstract])) OR ("Sri Lanka"[Title/Abstract])) OR (Afghanistan[Title/Abstract])) OR (Maldives[Title/Abstract])) **Filters:** English, from 2000/1/1 - 2021/5/20

## 2. Characteristics of included studies that assessed impact of the ISP

| Study ID                       | Geographical Location                                                       | Type of publication                                              | Study Design                                                                                                          | Participants                                                                                                                                                                                                                                                                                                                                                                                                                                                     | Income support program                                    | Outcome                                                                                                                                                                                                                                                                                                                   |
|--------------------------------|-----------------------------------------------------------------------------|------------------------------------------------------------------|-----------------------------------------------------------------------------------------------------------------------|------------------------------------------------------------------------------------------------------------------------------------------------------------------------------------------------------------------------------------------------------------------------------------------------------------------------------------------------------------------------------------------------------------------------------------------------------------------|-----------------------------------------------------------|---------------------------------------------------------------------------------------------------------------------------------------------------------------------------------------------------------------------------------------------------------------------------------------------------------------------------|
| Ahmed et al., 2008 [123]       | Bangladesh                                                                  | Journal article                                                  | Cross-sectional survey                                                                                                | Married, single women and all elderly persons ( $\geq 60$ years), both male and female                                                                                                                                                                                                                                                                                                                                                                           | 1. Old age allowance<br>2. Widow and poor women allowance | Food security                                                                                                                                                                                                                                                                                                             |
| Chakravorty, 2018 [92]         | India                                                                       | Thesis/dissertation                                              | Secondary data analysis using two rounds of data from IHDS (2005 and 2012), and Health & retirement study (1992-2012) | Sample population for IHDS survey                                                                                                                                                                                                                                                                                                                                                                                                                                | Indira Gandhi National Old age pension scheme             | Income security and labour supply                                                                                                                                                                                                                                                                                         |
| Chathukulam et al., 2012a [99] | India<br>Andhra Pradesh- Anantapur, Ranga Reddy and West Godavari districts | Organizational report submitted to Ministry of Rural Development | Impact evaluation using secondary data analysis and primary survey for detailed evaluation                            | Out of the 1488 beneficiaries 531 men (35.69%) and 957 women (64.31%). Out of 312 non beneficiaries, 57.69 percent is male. Majority lived with their children. Out of the 1488 surveyed beneficiaries 657 (44.15%) were reported to have visual disability, 71 (4.77%) were reported that they have locomotive disability, 119 (7.99%) had hearing disability and 30 (2.02%) speech disability. The deaf and dumb category was 607 (40.79 %) and other category | IGNOAPS                                                   | Broad outcome: 1) Awareness of the scheme; 2) process and effectiveness of current pension implementation system; 3) Income and expenditure pattern; 4) impression on the scheme<br><br>Specific outcome: 1) Awareness about pension disbursement; 2) Reasons for delay or gaps in pension disbursement; 3) Submission of |

|                                 |                                                            |                                                                  |                                                                                            |                                                                                                                                                                                                                                                                                                                                                                                                                                                                                                                                                                                                                                   |         |                                                                                                                                                                                                                                                          |
|---------------------------------|------------------------------------------------------------|------------------------------------------------------------------|--------------------------------------------------------------------------------------------|-----------------------------------------------------------------------------------------------------------------------------------------------------------------------------------------------------------------------------------------------------------------------------------------------------------------------------------------------------------------------------------------------------------------------------------------------------------------------------------------------------------------------------------------------------------------------------------------------------------------------------------|---------|----------------------------------------------------------------------------------------------------------------------------------------------------------------------------------------------------------------------------------------------------------|
|                                 |                                                            |                                                                  |                                                                                            | disability was 0.27 percent. Out of 312 respondents in non-beneficiary category 53.20 percent were deaf and dumb. It was reported that 29.49 percent had visual disability, 6.09 percent locomotive disability, 9.29 percent hearing disability, 1.60 percent speech disability and 0.32 percent have other type of disabilities. Out of the 385 beneficiaries who had income from some sources other than old age pension 230 beneficiaries (59.74 %) had income from daily wages, 143 beneficiaries (37.14 %) from agriculture and allied activities, and 11 beneficiaries (2.86 %) from self-employment other than agriculture |         | application forms by the beneficiaries; 4) Difficulties in getting application by the beneficiaries; 5) Income from IGNOAPS; 6) Utilization of last pension amount on food, medicines, relatives, healthcare; 7) Impact on life                          |
| Chathukulam et al., 2012b [100] | India (Gulberga, Mandya and Kodagu districts of Karnataka) | Organizational report submitted to Ministry of Rural Development | Impact evaluation using secondary data analysis and primary survey for detailed evaluation | There were 1332 beneficiaries covered from three districts of Karnataka, among 1136 beneficiaries from rural area and 196 from the urban area. Out of the total beneficiaries surveyed in the state, 1136 (85.29 %) were Hindus followed by Muslims 147 (11.04%) beneficiaries. The third position was of Christians and their share was 24 (1.84%), followed by Sikh with 1.28                                                                                                                                                                                                                                                   | IGNOAPS | Broad outcome: 1) Awareness of the scheme; 2) process and effectiveness of current pension implementation system; 3) Income and expenditure pattern; 4) impression on the scheme<br><br>Specific outcome:<br>1) Awareness about pension disbursement; 2) |

|  |  |  |                                                                                                                                                                                                                                                                                                                                                                                                                                                                                                                                                                                                                                                                                                                                                                                                                                                                                                                                                                                                                                     |  |                                                                                                                                                                                                                                                                                                            |
|--|--|--|-------------------------------------------------------------------------------------------------------------------------------------------------------------------------------------------------------------------------------------------------------------------------------------------------------------------------------------------------------------------------------------------------------------------------------------------------------------------------------------------------------------------------------------------------------------------------------------------------------------------------------------------------------------------------------------------------------------------------------------------------------------------------------------------------------------------------------------------------------------------------------------------------------------------------------------------------------------------------------------------------------------------------------------|--|------------------------------------------------------------------------------------------------------------------------------------------------------------------------------------------------------------------------------------------------------------------------------------------------------------|
|  |  |  | <p>percent. Other categories were very negligible. In rural area, out of the 1136 beneficiary's 86.62 percent were Hindus, 10.30 percent were Muslims and 1.67 percent were Christians. Whereas in urban area 77.55 percent of beneficiaries were belongs to Hindus and followed by Muslims, their share was 15.31 percent. Out of the 1332 beneficiaries more than 35 percent belonged to OBC, 24.62 percent belonged to SC, 11.26 percent belonged to ST and 28.23 percent belonged to general category. Among the rural beneficiaries, 34.33 percent were from OBC, 24.56 percent belonged to SC and 12.06 percent belonged to ST. The general category had 29.05 percent strength. In urban area again the OBC become dominant and their share was 44.90 percent, SCs were 25 percent and STs were 6.63 percent. The general category had 23.47 percent. Out of the 1332 beneficiaries more than one third of them were from the age group of 70-75, 31.83 percent of beneficiaries were from the age group of 65-70 years,</p> |  | <p>Reasons for delay or gaps in pension disbursement; 3) Submission of application forms by the beneficiaries; 4) Difficulties in getting application by the beneficiaries; 5) Income from IGNOAPS; 6) Utilization of last pension amount on food, medicines, relatives, healthcare; 7) Impact on life</p> |
|--|--|--|-------------------------------------------------------------------------------------------------------------------------------------------------------------------------------------------------------------------------------------------------------------------------------------------------------------------------------------------------------------------------------------------------------------------------------------------------------------------------------------------------------------------------------------------------------------------------------------------------------------------------------------------------------------------------------------------------------------------------------------------------------------------------------------------------------------------------------------------------------------------------------------------------------------------------------------------------------------------------------------------------------------------------------------|--|------------------------------------------------------------------------------------------------------------------------------------------------------------------------------------------------------------------------------------------------------------------------------------------------------------|

|  |  |  |  |                                                                                                                                                                                                                                                                                                                                                                                                                                                                                                                                                                                                                                                                                                                                                                                                                                                                                                            |  |  |
|--|--|--|--|------------------------------------------------------------------------------------------------------------------------------------------------------------------------------------------------------------------------------------------------------------------------------------------------------------------------------------------------------------------------------------------------------------------------------------------------------------------------------------------------------------------------------------------------------------------------------------------------------------------------------------------------------------------------------------------------------------------------------------------------------------------------------------------------------------------------------------------------------------------------------------------------------------|--|--|
|  |  |  |  | <p>17.42 percent were from the 75-80 age category, 9.83 percent were from the up to 65 age category, 5.03 percent were from 80-85 age category and 1.88 percent were from the above 85 age category. In rural areas, 32.31 percent of beneficiaries were from the age group of 70-75 years, 31.07 percent were from the age group of 65-70 years, 18.49 percent were from the age group of 75-80, and 10.30 percent were from the age group of up to 65 years. It was noticed that 23 beneficiaries were from the age group of above 85 years. In urban area also 70-75 age group was in top, which comes 43.88 per cent. Followed by 65-70 years of age group and their share was 36.22 percent and 11.22 percent of the urban beneficiaries are from the age group of 75-80 years. Majority lived with their children. More than three fourth (78.15%) of the beneficiaries surveyed were illiterate</p> |  |  |
|--|--|--|--|------------------------------------------------------------------------------------------------------------------------------------------------------------------------------------------------------------------------------------------------------------------------------------------------------------------------------------------------------------------------------------------------------------------------------------------------------------------------------------------------------------------------------------------------------------------------------------------------------------------------------------------------------------------------------------------------------------------------------------------------------------------------------------------------------------------------------------------------------------------------------------------------------------|--|--|

|                                                      |                                                                   |                                                                                          |                                                                                                                                                                                                                                             |                                                                                                                                                                                    |         |                                                                                                                                                                       |
|------------------------------------------------------|-------------------------------------------------------------------|------------------------------------------------------------------------------------------|---------------------------------------------------------------------------------------------------------------------------------------------------------------------------------------------------------------------------------------------|------------------------------------------------------------------------------------------------------------------------------------------------------------------------------------|---------|-----------------------------------------------------------------------------------------------------------------------------------------------------------------------|
| Chathukulam et al., 2012c [101]                      | India (Pondicherry, and Karikal districts of Puducherry)          | Organizational report submitted to Ministry of Rural Development                         | Primary data two districts and from each district four blocks were selected and in each block 10 GPs were selected for the study.<br><br>The secondary data is collected from State level, District level, Municipality level and GP level. | Elderly who were 65 years and above. They had varying ranges of disabilities like visual, auditory, speech impairment.                                                             | IGNOAPS | 1) Awareness of the scheme; 2) process and effectiveness of current pension implementation system; 3) Income and expenditure pattern; 4) impression on the scheme     |
| Chathukulam et al., 2012d [102]                      | India (Vellore, Perumbaloor and Nilgiris districts of Tamil Nadu) | Organizational report submitted to Ministry of Rural Development                         | Primary data two districts and from each district four blocks are selected and in each block 10 GPs are selected for the study. The secondary data is collected from State level, District level, Municipality level and GP level.          | Elderly who were 65 years and above. A majority of them belonged to below poverty line households and had varying ranges of disabilities like visual, auditory, speech impairment. | IGNOAPS | 1) Awareness of the scheme; 2) Process and effectiveness of current Pension implementation system; 3) Income and expenditure pattern; 4) impression on the scheme     |
| Grassroot Research and Advocacy Movement, n.d. [103] | India (Karnataka)                                                 | Organizational report submitted to The Director Directorate of Economics and Statistics, | -Secondary data analysis for phase 1.<br>-Primary data collection for phase 2<br>Beneficiary list of the entire state, maintained                                                                                                           | Older adults living in Karnataka                                                                                                                                                   | IGNOAPS | Trends and variations w.r.t different dimensions of the implementation of the scheme for e.g. 1) trends in allotment of new beneficiaries (taluk/district); 2) trends |

|                                    |                     |                         |                                      |                                                                                                                                                                                                                                                                                            |                                                          |                                                                                                                                                                                                                                                                                                                                                                                                                         |
|------------------------------------|---------------------|-------------------------|--------------------------------------|--------------------------------------------------------------------------------------------------------------------------------------------------------------------------------------------------------------------------------------------------------------------------------------------|----------------------------------------------------------|-------------------------------------------------------------------------------------------------------------------------------------------------------------------------------------------------------------------------------------------------------------------------------------------------------------------------------------------------------------------------------------------------------------------------|
|                                    |                     | Government of Karnataka | by the treasury in soft-copy format. |                                                                                                                                                                                                                                                                                            |                                                          | in Average duration of pensions for beneficiaries; 3) trends in delay between beneficiary approval and first pension delivery; 4) Identification and comparison of high beneficiary density taluks and their population densities. Identification and comparison of high beneficiary density taluks and their population densities; 5) Identification of Un-natural trends in scheme enrolment and duration of pensions |
| Handayani & Babajanian, 2012 [126] | Bangladesh<br>Nepal | Organizational report   | Mixed-method study                   | Elderly age group between 60 to 100 years                                                                                                                                                                                                                                                  | -Old age allowance program<br>-Senior Citizens Allowance | BANGLADESH Food security Social security Economic security<br>NEPAL Social security                                                                                                                                                                                                                                                                                                                                     |
| Jothi et al., 2016 [133]           | India               | Journal article         | Mixed methods study                  | 10 older adults recruited for pilot survey and 12 stake-holders for in-depth interviews. Participants were between the age group of 65 to 74 years.<br>64% of study participants lived with their sons or daughters 22% lived with their spouse 14% of the participants were living alone. | IGNOAPS                                                  | Health, Travel, Social security, economic empowerment                                                                                                                                                                                                                                                                                                                                                                   |

|                                |            |                       |                                                                                                                                                                                                     |                                                |                                                                                                                                                                                     |                                                                                                                                                                                                                   |
|--------------------------------|------------|-----------------------|-----------------------------------------------------------------------------------------------------------------------------------------------------------------------------------------------------|------------------------------------------------|-------------------------------------------------------------------------------------------------------------------------------------------------------------------------------------|-------------------------------------------------------------------------------------------------------------------------------------------------------------------------------------------------------------------|
| Kaushal, 2014<br>[86]          | India      | Journal article       | Secondary data analysis using data from two rounds of NSS survey (61 <sup>st</sup> and 64 <sup>th</sup> round)                                                                                      | Sample population selected during NSS survey   | NOAPS                                                                                                                                                                               | Elderly Employment, Household Expenditure, Elderly living arrangements. Models for: Effect of pension on HH Composition & Effect of NOAPS on the Probability of Having an Elderly Male or Female in the Household |
| Khondker et al., 2013<br>[110] | Bangladesh | Organizational report | Simulation/ Modelling HEIS survey data to provide descriptives and cross-tabs and then modelling                                                                                                    | Older adults who were 60 years and above       | Old Age Allowance (OAA) scheme                                                                                                                                                      | Poverty rates among older adults                                                                                                                                                                                  |
| Knox-Vydmanov, 2016<br>[114]   | Bangladesh | Organizational report | Secondary data analysis using Household Income and Expenditure Survey (2010) and Labour Force Survey (2013) for Bangladesh and Labour Force Survey (2008) and Living Standard Survey 2011 for Nepal | Sample population covered in the given surveys | <b>Bangladesh</b><br>-Civil Servant Retirement Scheme (CSRS)<br>-Old Age Allowance<br><b>Nepal</b><br>-Government pension scheme<br>-Employees Provident Fund<br>-Old Age Allowance | Social security, financial security                                                                                                                                                                               |

|                               |           |                       |                                                                                                                           |                                                                                                                                                                                                                                                                                |                                                                                                                                                                                  |                                                                                          |
|-------------------------------|-----------|-----------------------|---------------------------------------------------------------------------------------------------------------------------|--------------------------------------------------------------------------------------------------------------------------------------------------------------------------------------------------------------------------------------------------------------------------------|----------------------------------------------------------------------------------------------------------------------------------------------------------------------------------|------------------------------------------------------------------------------------------|
| Mirza, 2019<br>[115]          | India     | Thesis/Dissertation   | Secondary data analysis of two waves of Indian Human Development Survey (IHDS) data (2004-05 and 2011-12)                 | Sample population selected during IHDS survey                                                                                                                                                                                                                                  | -Indira Gandhi National Old Age Pension Scheme (IGNOAPS)                                                                                                                         | Labor supply of the beneficiary elderly                                                  |
| Mujahid et al., 2008<br>[135] | Sri Lanka | Organizational report | Qualitative study-participatory research. In depth interviews, focus group discussions, case studies                      | 60 years and above from Matara and Matale Districts (two rural and one urban in each), employed in the unorganized sector (farmers, fishermen and self-employed) and living with a family. The widows and widowers were dependent on the neighbours                            | -Old Age Allowance Programme<br>-Helpless Widows Allowance<br>-National Old Age Pension Scheme<br>-Old Age Allowance Scheme -Programme for Widowed, Deserted and Destitute Women | Social security                                                                          |
| Narayana, 2019<br>[113]       | India     | Journal article       | Utilised UNFPA (2012) survey to review the strength of the policy by collecting relevant data                             | 8329 elderly households with at least one member above 60yrs. of age. Total 9852 elderly individuals from seven states. Out of these 49.1% belonged to BPL households. 48% of BPL households were in the rural areas and 51.8% of the BPL households were from the urban areas | Indira Gandhi National Old Age Pension Scheme (IGNOAPS)                                                                                                                          | Awareness and utilization of IGNOAPS. Impact of IGNOAPS on poverty status of the elderly |
| NEPAN, 2011<br>[131]          | Nepal     | Organizational report | Mixed methods - Primary data via Survey questionnaire, Focus Group Discussions (FDG), Key Informant Interview (KII), Case | Elderly belonging to the age group of 60 to 69 years living with family and working in the unorganised sector Agricultural labor, Non-agricultural labor, traditional occupations such as                                                                                      | -Non- contributory Social Pension Scheme<br>-Widow allowance<br><br>-Jiuni- kind of indigenous safety net in the traditional society                                             | Social security, livelihood and health status                                            |

|                                          |            |                       |                                                                                                                                                                                                                      |                                                                                                                                                                                                                                                                                                            |                                                                                     |                                                                                                                                                                                               |
|------------------------------------------|------------|-----------------------|----------------------------------------------------------------------------------------------------------------------------------------------------------------------------------------------------------------------|------------------------------------------------------------------------------------------------------------------------------------------------------------------------------------------------------------------------------------------------------------------------------------------------------------|-------------------------------------------------------------------------------------|-----------------------------------------------------------------------------------------------------------------------------------------------------------------------------------------------|
|                                          |            |                       | study and Participant Observation.                                                                                                                                                                                   | sacerdotal work, tailoring, cobbling and smithy.                                                                                                                                                                                                                                                           |                                                                                     |                                                                                                                                                                                               |
| Planning Commission of India, 2011 [121] | India      | Organizational report | Cross-sectional survey - In depth questionnaire-based field survey, household survey, group discussion, direct observation.                                                                                          | Peasant farmers who were 60 years and above from Chhattisgarh, Madhya Pradesh, Gujarat, and Rajasthan and belonged to below poverty line earning USD 1.25 per day                                                                                                                                          | National Old Age Pension (NOAP) Scheme                                              | Social security                                                                                                                                                                               |
| Population Research Centre, 2009 [104]   | India      | Organizational report | Impact evaluation using primary and secondary data collected through instruments structured at different levels.<br><br>Secondary data obtained through the State, District, Block and Village level questionnaires. | 31% of the beneficiaries reported their ages 76 and higher living with family. 19% beneficiaries were handicapped whereas 20% were non- handicapped. 76% of the NOAPS beneficiaries were not doing any economically viable work, 15% beneficiaries did agricultural work and other small-scale businesses. | National Old Age Pension (NOAP) Scheme                                              | Process related to the implementation of the scheme, process of availing the benefits by the beneficiaries; impact of the scheme (not reported like this, out of data extractor's assumption) |
| Rahman, 2020 [137]                       | Bangladesh | Journal article       | Qualitative case study                                                                                                                                                                                               | People above 45 yrs. residing in Roumari upazila, Rajibpur upazila of Bangladesh<br><br>Majority of respondents could read and write from Roumari upazila and owned a small                                                                                                                                | -Old Age Allowance (OAA)<br>-Allowances for the Widows, Deserted & Destitute (AWDD) | Food consumption, Human development                                                                                                                                                           |

|                   |                           |                 |                                                                                                                                                                                                    |                                                                                                                                                                                                                                                                                                                                                                                                                                                                                                                                                                                                                           |                                                                              |                                                                                                                                                                         |
|-------------------|---------------------------|-----------------|----------------------------------------------------------------------------------------------------------------------------------------------------------------------------------------------------|---------------------------------------------------------------------------------------------------------------------------------------------------------------------------------------------------------------------------------------------------------------------------------------------------------------------------------------------------------------------------------------------------------------------------------------------------------------------------------------------------------------------------------------------------------------------------------------------------------------------------|------------------------------------------------------------------------------|-------------------------------------------------------------------------------------------------------------------------------------------------------------------------|
|                   |                           |                 |                                                                                                                                                                                                    | <p>percentage of property as opposed to Rajibpur upazila who could not read or write and did not own any property.</p> <p>From Roumari upzila, three respondents reported to have temporarily migrated to other districts of the country for employment. Two respondents from Rajibpur upazila reported temporary migration for employment.</p> <p>Majority recipients in Rajibur upazila received rice and blankets during floods from local and international NGOs. Hence, the targeted recipients of OAA/AWDD of Rajibur upazila received other benefits from the state and NGOs in comparison to Roumari upazila.</p> |                                                                              |                                                                                                                                                                         |
| Ramya, 2014 [124] | India (Arunachal Pradesh) | Journal article | Mixed method study<br>Primary data was collected using a combination of a survey and in-depth interviews. A self-administered questionnaire was used for the elderly Sample elements were selected | Tribal older adults above 65 yrs. of age from the Nyishi community of the Kurung Kumey district in Arunachal Pradesh                                                                                                                                                                                                                                                                                                                                                                                                                                                                                                      | Indira Gandhi National Old Age Pension Scheme (IGNOAPS) in Arunachal Pradesh | Poverty alleviation, perceptions of elderly about the scheme, expenditure patterns of the older adults, use of pension by the tribal older adults, nutritional security |

|                    |            |                     |                                                                                                                                                           |                                                                                                                                                                                                                                                                                                                                        |                                     |                                                                     |
|--------------------|------------|---------------------|-----------------------------------------------------------------------------------------------------------------------------------------------------------|----------------------------------------------------------------------------------------------------------------------------------------------------------------------------------------------------------------------------------------------------------------------------------------------------------------------------------------|-------------------------------------|---------------------------------------------------------------------|
|                    |            |                     | using purposive sampling.                                                                                                                                 |                                                                                                                                                                                                                                                                                                                                        |                                     |                                                                     |
| Samson, 2013 [132] | Nepal      | Book chapter        | Qualitative and secondary data analysis (micro simulation)<br>FGD and IDI with 54 beneficiaries in 4 rural and 2 urban localities in 5 districts of Nepal | Older adults above 60 yrs. covered under national survey                                                                                                                                                                                                                                                                               | Old age allowance                   | Static poverty gap (for estimating the reduction in poverty)        |
| Tiwari, 2010 [134] | India      | Thesis/dissertation | Qualitative study- in-depth interviews                                                                                                                    | Participants' age ranged from 60 years to 85 years. Amongst the women, the youngest was 60 years old, while the oldest was 85 years. Amongst the men, the youngest elderly was 62 years old, the eldest being 80 years. The individuals were either living alone or with family. Most of them belonged to lower middle income families | Old age Financial Assistance Scheme | Economic independence, social relevance, health status              |
| Uddin, 2013 [130]  | Bangladesh | Thesis/dissertation | Mixed method<br>Primary data were collected from targeted beneficiaries' and key informants such as ward member, female member, local elite               | Older adults above 65 yrs. residing in two unions of Galachipa Upazila under Patuakhali district                                                                                                                                                                                                                                       | Old Age allowance Program           | Food security, health care access, social security, quality of Life |



### 3. Information on different Income Support Programs in South Asia

| Country    | Name and details of the scheme                                                                                          | Population covered or eligibility criteria                                                                                                                                                                                                                                                       | Benefits offered                                                                                                                                                       |
|------------|-------------------------------------------------------------------------------------------------------------------------|--------------------------------------------------------------------------------------------------------------------------------------------------------------------------------------------------------------------------------------------------------------------------------------------------|------------------------------------------------------------------------------------------------------------------------------------------------------------------------|
| Bangladesh | Old age allowance (1998) by the Government of Bangladesh<br><br>Pillar 0                                                | Bangladeshi nationals, with a minimum age of 65 years for men and 62 years for women are eligible. Enrollees should have an average annual income of less than Rs 10,000 (USD 134.58) with no history of working in the formal sector. Priority is given to the oldest and the disabled persons. | The transfer value increased from an initial monthly value of BDT 100 (USD 1.18) in 1997- 98 to BDT 500 (USD 5.91) in 2021-22.                                         |
|            | Widow, Deserted and Destitute Women (1998-1999)<br>Ministry of Social Welfare, Government of Bangladesh<br><br>Pillar 0 | The recipients must be citizens of Bangladesh with average annual income less than Rs 12,000 (USD 161.51). Preference is given to elderly destitute and helpless widows or women with abusive husbands.                                                                                          | The allowance was 100 Tk (USD 1.18) at the time of the establishment of the program. With its expansion, the pension value has risen to 300 taka (USD 3.54) per month. |
|            | Compensation Pension by Government of Bangladesh (component of general pension system 1972)<br><br>Pillar 1             | This pension targets the officials who lost jobs due to the cancellation of their posts in downsizing some offices or organizations by the government.                                                                                                                                           | The officials are either appointed in a new post or transferred to other establishments.                                                                               |
|            | Family pension by Government of Bangladesh (component of general pension system 1972)<br><br>Pillar 1                   | In case of death of the pensioner, it is provided to the family of the pensioner                                                                                                                                                                                                                 | No information available                                                                                                                                               |

|  |                                                                                                                   |                                                                                                                                                                                                                                                                                    |                                                                                                                                 |
|--|-------------------------------------------------------------------------------------------------------------------|------------------------------------------------------------------------------------------------------------------------------------------------------------------------------------------------------------------------------------------------------------------------------------|---------------------------------------------------------------------------------------------------------------------------------|
|  | Invalid Pension Government of Bangladesh (component of general pension system 1972)<br><br>Pillar 1               | This pension is granted to an employee who becomes invalid permanently. If an employee applies for invalid pension before attaining 57 years of age, the head of office processes the sanction for the pension based on medical certificate as to the invalidation of the employee | No information available                                                                                                        |
|  | Optional pension by Government of Bangladesh (component of general pension system 1972)<br><br>Pillar 1           | For any public servant having completed 25 years of service and who wishes to discontinue working by giving a 30 days prior notice.                                                                                                                                                | No information available                                                                                                        |
|  | Retiring pension by Government of Bangladesh (component of general pension system 1972)<br><br>Pillar 1           | This pension is provided to public servants completing 25 years of service                                                                                                                                                                                                         | No information available                                                                                                        |
|  | Superannuation pension scheme Government of Bangladesh (component of general pension system 1972)<br><br>Pillar 1 | Mainly for public servants who retire compulsorily at a certain age fixed by the Public Service Act 1974. Minimum qualifying years of service is 25 years.                                                                                                                         | 90% of the last month's pay.                                                                                                    |
|  | National Pension and Provident Fund in March (2000) by Government of Bhutan.                                      | This scheme includes all Government Employees Provident Fund members                                                                                                                                                                                                               | Tier 1 includes the following six types of pension benefits:<br>-Pension for members on a monthly basis<br>-Incapacity for life |

|               |                                                                                                                                                                                                                                 |                                                                                                                                                                                                                                                                                                                                                                                                                                                                                                                                                           |                                                                                                                                                                                                                                                                                                                                                                                                                                                                                                                                                                             |
|---------------|---------------------------------------------------------------------------------------------------------------------------------------------------------------------------------------------------------------------------------|-----------------------------------------------------------------------------------------------------------------------------------------------------------------------------------------------------------------------------------------------------------------------------------------------------------------------------------------------------------------------------------------------------------------------------------------------------------------------------------------------------------------------------------------------------------|-----------------------------------------------------------------------------------------------------------------------------------------------------------------------------------------------------------------------------------------------------------------------------------------------------------------------------------------------------------------------------------------------------------------------------------------------------------------------------------------------------------------------------------------------------------------------------|
| <b>Bhutan</b> | <p>Restructured the erstwhile Government Employees Provident Fund Scheme (1976) as follows</p> <ul style="list-style-type: none"> <li>-Tier 1- National Pension Plan</li> <li>-Tier2 –Provident Fund</li> </ul> <p>Pillar 2</p> | <p>Contributions by the employees must be made for a minimum of 10 years (equivalent to 120 monthly contributions).</p> <p>Eligibility criteria:</p> <ul style="list-style-type: none"> <li>-Retired from service (at normal retirement age or early retirement age)</li> <li>-Those retired from military service and civil service (the age of retirement for civil and armed forces is different- depending on rank). Early retirement age irrespective of position or rank is 51 years.</li> </ul> <p>Contribution ceiling period is 30-33 years.</p> | <ul style="list-style-type: none"> <li>-Survivor's partner</li> <li>-Children who have survived</li> <li>-Orphans</li> <li>-Parent who is dependent</li> </ul> <p>Tier 2 benefits include:</p> <ul style="list-style-type: none"> <li>- Upon leaving employment, a lump sum payment of cumulative contributions is payable, as well as returns credited to an individual's Tier 2 account.</li> <li>- In the event of death, a lump sum payment will be made to the nominees.</li> <li>- Allow early withdrawals for house construction/repairs/child education.</li> </ul> |
|               | <p>Gratuity scheme, Bhutan (1962)</p> <p>Pillar 2</p>                                                                                                                                                                           | <p>Introduced in 1962, this is a fully financed scheme from the general public budget. Gratuity is a lump sum payment made to an employee by the employers at the time of separation from service. It is a defined benefit scheme, or one that operates without contribution from employees based on the work history of the employee.</p>                                                                                                                                                                                                                | <ul style="list-style-type: none"> <li>- The employer, on behalf of an employee, makes gratuity fund contribution to Bhutan Insurance Limited</li> <li>- All employers remit gratuity fund contributions, indicating the contribution amounts along with a detailed list clearly.</li> <li>- For new members, the contribution is last month basic pay times, number of years in the service as per member organization service rule book.</li> </ul> <p>Thereafter, on an annual basis, last month's basic pay.</p>                                                        |

|  |                                                                                                                                                                                                                                                                                                                                                                                                      |                                                                                                                                                                                                                                                                                                                      |                                                                                                                                                                                                                                                                                                                                                                                                                                                                                                                                                                                                                                                                                                                                                             |
|--|------------------------------------------------------------------------------------------------------------------------------------------------------------------------------------------------------------------------------------------------------------------------------------------------------------------------------------------------------------------------------------------------------|----------------------------------------------------------------------------------------------------------------------------------------------------------------------------------------------------------------------------------------------------------------------------------------------------------------------|-------------------------------------------------------------------------------------------------------------------------------------------------------------------------------------------------------------------------------------------------------------------------------------------------------------------------------------------------------------------------------------------------------------------------------------------------------------------------------------------------------------------------------------------------------------------------------------------------------------------------------------------------------------------------------------------------------------------------------------------------------------|
|  | <p>National Social Assistance Programme (NSAP) -Old age Protection</p> <p>Indira Gandhi National Old Age Pension earlier (2007) known as the Old Age Pension Scheme and the National Old Age Pension Scheme (1995). The scheme is by the central Government of India. State governments of the respective states and Union Territories, provide a co-contribution in the scheme.</p> <p>Pillar 0</p> | <p>Older adults above the age of 60 yrs. belonging to a below poverty line household</p>                                                                                                                                                                                                                             | <p>200 INR (USD 2.69) given monthly to 69-79 yrs age group</p> <p>500 INR (USD 6.74) given monthly to elderly above the age of 80 years</p> <p>Additionally, following states provide top up:</p> <p>Meghalaya, Mizoram: Rs 50</p> <p>Madhya Pradesh: Rs 75</p> <p>Chhattisgarh, Odisha, Uttar Pradesh: Rs 100</p> <p>Assam, Gujarat, Jammu &amp; Kashmir: Rs 200</p> <p>Kerala, Punjab, West Bengal: Rs 250</p> <p>Rajasthan, Tripura, Karnataka: Rs 300</p> <p>Bihar, Maharashtra, Sikkim: Rs 400</p> <p>Uttarakhand: Rs 600</p> <p>Andhra Pradesh, Tamil Nadu, Dadra &amp; Nagar Haveli, Daman &amp; Diu, Lakshadweep: Rs 800</p> <p>Chandigarh, Delhi, Himachal Pradesh, Telangana: Rs 1000</p> <p>Haryana: Rs 1200</p> <p>Goa, Puducherry: Rs 1800</p> |
|  | <p>Indira Gandhi National Widow Pension Scheme (Component of NSAP 1995)</p> <p>Government of India</p> <p>Pillar 0</p>                                                                                                                                                                                                                                                                               | <p>Widows, aged 40-79 years, living below poverty line are eligible for this scheme. The widow should not have re-married.</p> <p>In Karnataka: 18+ years, having no more than 10,000 INR (134.74) monthly income.</p> <p>In West Bengal: The widow must have a monthly income of less than 1000 INR (USD 13.47)</p> | <p>The beneficiaries receive a monthly pension of Rs 300/ USD 4.04 (age 40-79 years) and Rs 500/ USD 6.74 (age 80 and above)</p> <p>West Bengal: 750 INR (USD 10.11) monthly income by the state government to the eligible widows</p>                                                                                                                                                                                                                                                                                                                                                                                                                                                                                                                      |

|       |                                                                                                                                                                                                      |                                                                                                                                                                                                                                                                                  |                                                                                                                                                                                       |
|-------|------------------------------------------------------------------------------------------------------------------------------------------------------------------------------------------------------|----------------------------------------------------------------------------------------------------------------------------------------------------------------------------------------------------------------------------------------------------------------------------------|---------------------------------------------------------------------------------------------------------------------------------------------------------------------------------------|
| India |                                                                                                                                                                                                      | In Kerala: A widow or divorcee whose husband must be dead or is missing for more than 7 years.<br>The widow should not have re-married<br>The woman must be destitute and not involved in begging. The average household income must not be more than 1,00,000 INR (USD 1347.40) | Kerala: 1400 INR (USD 18.86) monthly allowance to widows as of 01/09/2020                                                                                                             |
|       | Indira Gandhi National Disability Pension Scheme (Component of NSAP 1995)<br>Government of India<br>Pillar 0                                                                                         | Individuals, aged 18-79 years, living below poverty line and having 80% and above/ multiple disabilities are eligible to receive the pension.                                                                                                                                    | The central government provides the beneficiaries with Rs 300 (USD 4.04) per month.                                                                                                   |
|       | Madhu Babu Pension Yojana (2008) by Central government of India (The Revised Old Age Pension Rules, 1989, and the Disability Pension Rules, 1985, have been combined into this plan)<br><br>Pillar 0 | Open to people over the age of 65, PWDs, and state widows. The participants of this scheme get a pension from the state government.<br>Widows of at least 18 years, 40% disability, BPL and household with a monthly income of less than 12000 rupees a year                     | The beneficiaries are paid Rs. 300 (USD 4.05) each month under this scheme.                                                                                                           |
|       | Old Age Pension Scheme for Transgenders (2016-17) by state government of Kerala                                                                                                                      | Transgenders who are 60 years and above                                                                                                                                                                                                                                          | No information available                                                                                                                                                              |
|       | Pension schemes for vulnerable groups (early 70's) by state government of Tamil Nadu<br><br>Pillar 0                                                                                                 | Older adults                                                                                                                                                                                                                                                                     | The impoverished, widows, and deserted wives. The elderly can take advantage of government programs that provide them with free nutritional meals, free rice, and free dhotis/sarees. |

|  |                                                                                                                                                   |                                                                                                                                                                                                |                                                                                                                                                                                                                                                                                           |
|--|---------------------------------------------------------------------------------------------------------------------------------------------------|------------------------------------------------------------------------------------------------------------------------------------------------------------------------------------------------|-------------------------------------------------------------------------------------------------------------------------------------------------------------------------------------------------------------------------------------------------------------------------------------------|
|  | Briddashree, Sanjabhati and Pranam schemes by state government of West Bengal<br><br>Pillar 0                                                     | Older adults                                                                                                                                                                                   | The scheme ensures good health and physical safety                                                                                                                                                                                                                                        |
|  | Odisha treatment fund and Emergency treatment programme by state government of Odisha                                                             | Older adults in the KBK region of Odisha                                                                                                                                                       | Medical care to the older adults                                                                                                                                                                                                                                                          |
|  | Shravanbal Pension Scheme by state government (2021) of Maharashtra.<br>The scheme has two categories - Category A and Category B<br><br>Pillar 0 | Older adults above the age of 65 years.<br>Category A - individuals whose names do not appear on the BPL list.<br>Category B- individuals who are included in the BPL list                     | The Maharashtra government would pay Rs 600(USD 8.09) per month to recipients whose names appear in category A.<br>Category B persons receive Rs 400 (USD 5.39) per month from the state government and Rs 200 (USD 2.70) from the central government under IGNOAPS.                      |
|  | Sanjay Gandhi Niradhar Pension Scheme by state government of Maharashtra<br>Year not found online/data extraction sheet<br><br>Pillar 0           | Destitute persons, blind, disabled, orphan children, persons suffering from major illnesses, divorced women, abandoned women, women freed from prostitution, outraged women, Transgender, etc. | Each beneficiary receives Rs.600(USD 8.09) per month, while families with multiple beneficiaries will receive Rs.900 (USD 12.14) per month. Benefits shall be paid to the beneficiary until his or her children reach the age of 25 or until he or she finds work, whichever comes first. |

|  |                                                                                                        |                                                                                                                                                                                                                                                                                                  |                                                                                                                                                                                                                                                                          |
|--|--------------------------------------------------------------------------------------------------------|--------------------------------------------------------------------------------------------------------------------------------------------------------------------------------------------------------------------------------------------------------------------------------------------------|--------------------------------------------------------------------------------------------------------------------------------------------------------------------------------------------------------------------------------------------------------------------------|
|  | National Family Benefit Scheme<br>(Component of NSAP 1995)<br>Government of India<br><br>Pillar 0      | Assistance to bereaved household in the event of the death of the primary breadwinner, aged 18-60 years (irrespective of the cause of death). This scheme is applicable to families living below poverty line.                                                                                   | A lump-sum assistance of Rs 20,000 (USD 269.67) is provided to the bereaved family.                                                                                                                                                                                      |
|  | Sandhya Suraksha Yojana<br>Government of Karnataka<br><br>Pillar 0                                     | Beneficiaries of this scheme include small farmers, agricultural laborer's, weavers, fisherman and unorganized workers aged 60 years and above. Persons availing other pension schemes or those with an annual household income greater than Rs 20,000 (USD 269.43) are not eligible.            | A monthly assistance of Rs 1000 (USD 13.47) is provided to the enrollees.                                                                                                                                                                                                |
|  | Vayomithram<br>Government of Kerala<br><br>Pillar 0                                                    | Elderly citizens, aged 65 years and above, living at Corporation and Municipality areas in Kerala state.                                                                                                                                                                                         | Provides free healthcare to the elderly by means of mobile clinics, counselling facilities, palliative care and help desk.                                                                                                                                               |
|  | Old Age Financial Assistance Scheme (1975) by Government of Delhi<br><br>Pillar 0                      | Elderly who are 60 years and above, residing in Delhi for more than 5 years having an annual income not more than 60,000 INR (USD 505.07). For this reason, the applicant must not be receiving any pension or financial help from the Central/State Governments, MCD/NDMC, or any other source. | Currently, 1000 INR (USD 1.35) per person per month is remitted to the recipients' accounts on a quarterly basis. If more than one member of a household is qualified for help under the scheme, each of them gets given 1000 INR (USD 1.35) per month upon application. |
|  | Antodaya Anna Yojana by the Department of Food and Public Distribution, Govt. of India<br><br>Pillar 0 | Populations eligible are: widows, terminally ill, disabled persons or older adults with no assured means of maintenance or societal support                                                                                                                                                      | Food grains- rice and wheat are made available to the households at a subsidised rate.                                                                                                                                                                                   |

|  |                                                                                                          |                                                                                                                                                                                                                                       |                                                                                                                                                                                                                                                                                                                |
|--|----------------------------------------------------------------------------------------------------------|---------------------------------------------------------------------------------------------------------------------------------------------------------------------------------------------------------------------------------------|----------------------------------------------------------------------------------------------------------------------------------------------------------------------------------------------------------------------------------------------------------------------------------------------------------------|
|  | Civil service defined benefit pension schemes by Central Government of India<br>Pillar 1                 | Applicable to government employees<br>- The normal retirement age for the civil service pension scheme is 60 years (62 years for government teachers).<br>-After 20 years of service, a government employee is entitled to a pension. | A monthly pension equal to 50% of the average monthly earnings during the last year of employment is known as a full superannuation benefit. The pension is indexed to provide retirees with a true annuity.                                                                                                   |
|  | National Institute of Social Defense, taxation Rebate (1961) by Central Government of India<br>Pillar 1  | Elderly above 65 years are eligible                                                                                                                                                                                                   | Section 88B of the Finance Act, 1992, provides a 10,000 INR (USD 134.74) income tax rebate for persons over 65 years of age, as well as a 20,000 INR (USD 269.48) deduction for medical insurance premiums (sec 80 DDB). Senior citizens are exempt from paying income tax on amounts up to 2.4 lakh per year. |
|  | National Institute of Social Defense Insurance Schemes (1961) by Central Government of India<br>Pillar 1 | Elderly above the age of 55 years                                                                                                                                                                                                     | No information available                                                                                                                                                                                                                                                                                       |

|  |                                                                                                                       |                                                                                                                                                                                                                                                                                                                                                                    |                                                                                                                                                                                                                                                                                                                                                                                                                                                                                 |
|--|-----------------------------------------------------------------------------------------------------------------------|--------------------------------------------------------------------------------------------------------------------------------------------------------------------------------------------------------------------------------------------------------------------------------------------------------------------------------------------------------------------|---------------------------------------------------------------------------------------------------------------------------------------------------------------------------------------------------------------------------------------------------------------------------------------------------------------------------------------------------------------------------------------------------------------------------------------------------------------------------------|
|  | <p>National Institute of Social Defense, travel Concessions (1961) by Central Government of India</p> <p>Pillar 1</p> | <p>Elderly above the age of 60 years</p>                                                                                                                                                                                                                                                                                                                           | <ul style="list-style-type: none"> <li>• Indian railways offer 30% discounts in all classes and trains, priority for low-birth-rate people, and separate reservation counters for citizens over the age of 60.</li> <li>• For elderly persons over the age of 60, Air India, Air Sahara, and Jet Airways offer a 50% reduction on the basic fare for travel in economy class.</li> <li>• In Punjab, ladies above the age of 60 are allowed to ride the bus for free.</li> </ul> |
|  | <p>Employees Provident Fund (1952) by Central Government of India</p> <p>Pillar 2</p>                                 | <p>Employees in companies who earn less than INR 6,500 per month (USD 87.58)</p> <p>The employee contributes 12% 7) of his monthly PF Salary (Basic + Dearness Allowance) to the fund, which is matched by the employer. The EPF receives 3.67 percent of the Employer's share.</p>                                                                                | <p>Every year, the scheme's corpus earns an administered rate of return (For 2007-2008 it was 8.5 percent). On retirement, the interest-bearing account is repaid.</p> <p>After reaching the age of 55, full accumulations are paid upon retiring from service.</p>                                                                                                                                                                                                             |
|  | <p>Employees pension Scheme (1995) by Central government of India</p> <p>Pillar 2</p>                                 | <p>Employees in companies who earn less than INR 6,500 per month (USD 87.58). After 2014, the wage ceiling increased to 15000 INR per month (189.79 USD).</p> <p>The employee should have completed 10 yrs in service and should be a member of Employees' Provident Fund Organization (EPFO).</p> <p>The employer is responsible for 12% of the contribution.</p> | <p>This fund is used to pay various pension benefits upon retirement or early termination of employment.</p> <p>Provision of a minimum pension of INR 1000 per month (12.65 USD) introduced after September 1, 2014.</p>                                                                                                                                                                                                                                                        |

|  |                                                                                           |                                                                                                                                                                                                                                                                                                                                                                                                                                                      |                                                                                                    |
|--|-------------------------------------------------------------------------------------------|------------------------------------------------------------------------------------------------------------------------------------------------------------------------------------------------------------------------------------------------------------------------------------------------------------------------------------------------------------------------------------------------------------------------------------------------------|----------------------------------------------------------------------------------------------------|
|  |                                                                                           | 8.33 percent of the PF Salary is diverted to EPS, while the Central Government gives 1.16 percent of the PF Salary to EPS as a subsidy.                                                                                                                                                                                                                                                                                                              |                                                                                                    |
|  | Employees' Deposit Linked Income Scheme (1976) by Central government of India<br>Pillar 2 | This pension is given to the employee's family in the event of an employee's death                                                                                                                                                                                                                                                                                                                                                                   | Dependents are covered by an insurance plan based on the amount of PF the employee had accumulated |
|  | National Pension System (2004) by Central government of India<br><br>Pillar 2             | <p>New employees to Central Government service, excluding the Armed Forces, who start on or after January 1, 2004.</p> <p>Any Indian citizen between the ages of 18 and 55 years old can join and stay until they reach the age of 60. The employee contributes monthly during their working period.</p> <p>The employee is required to contribute 10% of salary and Dearness Allowance (DA) with matching contributions @14% by the government.</p> | The employee receives the accumulated pension amount after retirement.                             |

|  |                                                                                           |                                                                                                                                                                                                                                                                                                                                                                                    |                                                                                                                                                                                                                                                                                                                   |
|--|-------------------------------------------------------------------------------------------|------------------------------------------------------------------------------------------------------------------------------------------------------------------------------------------------------------------------------------------------------------------------------------------------------------------------------------------------------------------------------------|-------------------------------------------------------------------------------------------------------------------------------------------------------------------------------------------------------------------------------------------------------------------------------------------------------------------|
|  | <p>Payment of Gratuity Act (1972) by Central government of India</p> <p>Pillar 2</p>      | <p>To avail this pension benefit:<br/>A qualifying government employee must have worked for at least five years.</p> <p>Eligible members: People who work for a living in industries, factories, and institutions. Factories, mines, and oilfields. Plantations, ports, railway enterprises, and stores and commercial establishments with ten or more employees are included.</p> | <p>Lump sum benefit in the form of gratuity</p>                                                                                                                                                                                                                                                                   |
|  | <p>Pradhan Mantri Suraksha Bima Yojana by Central Government of India</p> <p>Pillar 2</p> | <p>Savings bank account holders aged 18–70 years can join the scheme. It is offered by Public Sector General Insurance Companies or other General Insurance Company which offer the scheme on similar terms in tie up with banks and other approvals.</p>                                                                                                                          | <p>The premium for the scheme is Rs 20 (USD 0.25) per year per member and is auto-debited directly from the bank account. The scheme offers a coverage of ₹ 200,000 (USD 2696.71) for death or total and irrevocable loss of both eyes and ₹ 100,000 (USD 1348.35) coverage for the loss of an eye or a limb.</p> |
|  | <p>Civil Service Pension system (1972) by Central government of India</p> <p>Pillar 2</p> | <p>Civil servants who joined the services before 2004. One had to have worked for at least ten years to be eligible for retirement, and the retirement age was 58 yrs.</p>                                                                                                                                                                                                         | <p>As a monthly pension, the retiring employee earns 50% of his or her last drawn wage.</p>                                                                                                                                                                                                                       |
|  | <p>Coal Miners Provident Fund (1948) by Central Government of India</p> <p>Pillar 2</p>   | <p>Persons employed in any coal mine or class of coal mines</p>                                                                                                                                                                                                                                                                                                                    | <p>Superannuation pension, retiring pension and permanent disability pension to the family of the employee.<br/>- superannuation pension, retiring pension or permanent total disablement</p>                                                                                                                     |

|  |                                                                                                  |                                                                                                                                                                                                                                                                                                                |                                                                                                                                                                                                                                                                                                                                                                                                                                                                                                                                                                                                                                                                              |
|--|--------------------------------------------------------------------------------------------------|----------------------------------------------------------------------------------------------------------------------------------------------------------------------------------------------------------------------------------------------------------------------------------------------------------------|------------------------------------------------------------------------------------------------------------------------------------------------------------------------------------------------------------------------------------------------------------------------------------------------------------------------------------------------------------------------------------------------------------------------------------------------------------------------------------------------------------------------------------------------------------------------------------------------------------------------------------------------------------------------------|
|  |                                                                                                  |                                                                                                                                                                                                                                                                                                                | <p>pension to the persons employed in any coal mine or class of coal mines; and</p> <p>- widow or widower pension, children pension or orphan pension and life assurance benefits, payable to the beneficiaries of such employees.</p>                                                                                                                                                                                                                                                                                                                                                                                                                                       |
|  | <p>Seaman Provident Fund (1966) by Central government of India</p> <p>Pillar 2</p>               | <p>Seamen working in shipping industry – Merchant Navy</p> <p>The employer contributes 12% of the wages (1997), and the seaman contributes equally to the fund</p>                                                                                                                                             | <p>Under the agreement with the crew or any other arrangement between the parties, the seaman is entitled to an old age pension, gratuity, or provident fund.</p>                                                                                                                                                                                                                                                                                                                                                                                                                                                                                                            |
|  | <p>Assam Tea Plantation Provident Fund (1955) by Central Government of India</p> <p>Pillar 2</p> | <p>Employees of the tea plantation or tea factory who receive their monthly salary. Daily wage laborers. Employees contribute 12% of their pay, which includes dearness allowances, food concessions, and the amount paid for picking tea leaves. The company contributes the same amount as the employee.</p> | <p>Employees receive withdrawal benefit on resignation or retirement. They also receive a family pension benefit in the event of the death of the employee. If a member retires at the age of 58 and has served in the Provident Fund for 25 years, he or she is entitled to the full Pensioner benefit (withdrawal).</p> <p>Family pension benefit of 175 INR (USD 2.36) to 450 INR (USD 1.95) per month is paid to the widow/widower/son/daughter, based on the amount of P.F. balance at credit at the time of the member's death, plus a lump sum value of 2000 INR (USD 26.95) Members also receive deposit linked insurance benefit and loan and advances benefit.</p> |

|  |                                                                                                                           |                                                                                                                                                                                                                                                                                    |                                                                                                                                                                                             |
|--|---------------------------------------------------------------------------------------------------------------------------|------------------------------------------------------------------------------------------------------------------------------------------------------------------------------------------------------------------------------------------------------------------------------------|---------------------------------------------------------------------------------------------------------------------------------------------------------------------------------------------|
|  |                                                                                                                           |                                                                                                                                                                                                                                                                                    |                                                                                                                                                                                             |
|  | <p>J&amp;K Provident Fund (1961) by Central government of India</p> <p>Pillar 2</p>                                       | <p>Working class of Jammu and Kashmir and Ladakh. The employer's contributions under the Scheme will be based on a percentage of the basic salary and dearness allowance (including the cash value of any food concession) paid to each employee covered by the Scheme.</p>        | <p>Pension coverage to those above 58 years who made a contribution to the PF for 10 years. High Life Insurance benefit from 2,50,000 INR to (USD 3368.50) TO 6,00,00 INR (USD 8084.40)</p> |
|  | <p>Self-help groups women Co-contribution pension Scheme (2009) by state government of Andhra Pradesh</p> <p>Pillar 2</p> | <p>A woman who has been an active member of a Self-Help Group for an year. The eligible age of entry is 18 yrs till before retirement age (59 yrs). Contribution of Rs 30 per month by the women and an equal periodic co-contribution by the government (subject to changes).</p> | <p>A life- longmonthly pension will be paid to a subscriber who has reached retirement age and has met all of the requirements.</p>                                                         |

|  |                                                                                                            |                                                                                                                                                                                                                                                                                                                                                                                                                                                                                                                                                                                                                                                                                                 |                                                                                                                                                                                                                          |
|--|------------------------------------------------------------------------------------------------------------|-------------------------------------------------------------------------------------------------------------------------------------------------------------------------------------------------------------------------------------------------------------------------------------------------------------------------------------------------------------------------------------------------------------------------------------------------------------------------------------------------------------------------------------------------------------------------------------------------------------------------------------------------------------------------------------------------|--------------------------------------------------------------------------------------------------------------------------------------------------------------------------------------------------------------------------|
|  | <p>Employees pension Scheme (1995) by Central government of India</p> <p>Pillar 3</p>                      | <p>Employees in companies who earn less than INR 6,500 per month (USD 87.58). After 2014, the wage ceiling increased to 15000 INR per month (189.79 USD).</p> <p>The employee should have completed 10 yrs in service and should be a member of Employees' Provident Fund Organization (EPFO).</p> <p>The employer is responsible for 12% of the contribution.</p> <p>8.33 percent of the PF Salary is diverted to EPS, while the Central Government gives 1.16 percent of the PF Salary to EPS as a subsidy.</p>                                                                                                                                                                               | <p>This fund is used to pay various pension benefits upon retirement or early termination of employment.</p> <p>Provision of a minimum pension of INR 1000 per month (12.65 USD) introduced after September 1, 2014.</p> |
|  | <p>Public Provident Fund (1968) by Central government of India, New PPF scheme of 2019</p> <p>Pillar 3</p> | <p>For employees in the unorganized, self-employed, or informal sector. An account on behalf of the minor can be opened by the guardian.</p> <p>Initial subscription fees were INR 100. PPF members could contribute between INR 500INR (USD 6.33) and INR 1,50,000 (USD 1897.88) per fiscal year to their accounts, which mature in 15 years and can be extended by 5 years at a time at the account holder's discretion.</p> <p>According to the new PPF scheme of 2019:</p> <p>In addition to the previous eligible population, an account can also be opened for a person with 'unsound mind', on behalf of the guardian.</p> <p>Initial subscription fees have been raised to INR 500.</p> | <p>The principal amount invested in a PPF account is subject to income tax exemptions.</p> <p>The whole interest earned on a PPF investment is likewise not subject to taxation.</p>                                     |

|  |                                                                                                                                         |                                                                                                                                                                                                                 |                                                                                                                                                                                                                                                                                                                                                                                                                                                                                                                                       |
|--|-----------------------------------------------------------------------------------------------------------------------------------------|-----------------------------------------------------------------------------------------------------------------------------------------------------------------------------------------------------------------|---------------------------------------------------------------------------------------------------------------------------------------------------------------------------------------------------------------------------------------------------------------------------------------------------------------------------------------------------------------------------------------------------------------------------------------------------------------------------------------------------------------------------------------|
|  | General Provident Fund (GPF) Scheme (1968) - a component of Public Provident Fund scheme by Central government of India<br><br>Pillar 3 | Eligible only for government or public sector employees.<br><br>Employees are required to voluntarily contribute at least 6% of their monthly salary.                                                           | At the time of retirement, the worker receives a lump sum payment from the GPF account including the interest amount. Current rate of interest is 7.1% (subject to change with each financial year).                                                                                                                                                                                                                                                                                                                                  |
|  | Varistha Pension Bima Yojna Plan number 828 (2014) by Life Insurance Corporation of India<br><br>Pillar 3                               | Individuals who are 60 years and above are eligible. Minimum purchase price for monthly pension is INR 66,665 (USD 843.48) and maximum monthly purchase price is INR 6,66,665 (USD 8435.01)                     | Lifetime pension effective returns at 9.38% p.a.<br>Minimum monthly pension of INR 500 and maximum monthly pension of INR 5000.<br>After three policy years, a loan facility is available. The maximum loan amount that can be granted is 75% of the purchase price. After 15 years, the insurance can be surrendered, and the surrender value is the reimbursement of the purchase price. A policy can be surrendered in extraordinary circumstances for the treatment of a serious or terminal sickness in oneself or one's spouse. |
|  | Jeevan Nidhi Plan Number 169 (2014) by Life Insurance Corporation of India<br><br>Pillar 3                                              | Entry age: Individuals between the age group of 18 (age of maturity is 40 yrs)-65 yrs.(age of maturity 75 yrs). Minimum monthly premium 1000 INR (USD 13.47) and minimum yearly premium is 5000 INR (USD 57.67) | For the first five years, the insurance will have a guaranteed addition, and for the remaining years, the policy will participate in a bonus.<br>If a life guaranteed dies during the deferment period, the death claim amount will not be converted into an                                                                                                                                                                                                                                                                          |

|  |                                                                                                                    |                                                                                                                                                                                                                        |                                                                                                                                                                                                                                                                                                                                                                                                                                                                   |
|--|--------------------------------------------------------------------------------------------------------------------|------------------------------------------------------------------------------------------------------------------------------------------------------------------------------------------------------------------------|-------------------------------------------------------------------------------------------------------------------------------------------------------------------------------------------------------------------------------------------------------------------------------------------------------------------------------------------------------------------------------------------------------------------------------------------------------------------|
|  |                                                                                                                    |                                                                                                                                                                                                                        | <p>annuity but will be paid in a lump payment to the nominee.</p> <p>The Jeevan Nidhi plan is a profit-sharing plan that offers death insurance during the deferral period and compulsorily converts the maturity profits to purchase annuities at then-current rates if you live to the maturity/vesting date.</p>                                                                                                                                               |
|  | <p>Jeevan Akshay-6 (2007)</p> <p>Plan number 189</p> <p>by Life Insurance Corporation of India</p> <p>Pillar 3</p> | <p>Individuals between the age group of 30-100 years are eligible.</p> <p>Single premium of INR 100,000 (USD 1265.25)</p>                                                                                              | <p>Fixed rate of interest irrespective of market conditions.</p> <p>Depending on the policy taker, annuity can be paid monthly, quarterly, half-yearly or yearly intervals</p> <p>All annuity choices, with the exception of the annuity for life with return of purchase price on death, requires a standard age proof. Guaranteed surrender value paid up value, special surrender value, loan, and double accident benefit are not included in the policy.</p> |
|  | <p>Atal Pension Yojana (2015)</p> <p>Formerly known as NPS Lite</p> <p>Government of India</p> <p>Pillar 3</p>     | <p>Individuals aged 18 to 40 years, who are engaged in the unorganized sector, and are not availing any statutory social security schemes.</p> <p>Contributions can be made on monthly/quarterly/half-yearly basis</p> | <p>Depending on their contributions, subscribers would receive a fixed pension of Rs 1,000- Rs 5000 (USD 13.49 -USD 67.45) from 60 years of age. The limited government co-contribution is up to Rs 1000 (USD 13.49) per annum. The pension will be</p>                                                                                                                                                                                                           |

|  |                                                                                                                                                   |                                                                                                                                                                                                             |                                                                                                                                                                                          |
|--|---------------------------------------------------------------------------------------------------------------------------------------------------|-------------------------------------------------------------------------------------------------------------------------------------------------------------------------------------------------------------|------------------------------------------------------------------------------------------------------------------------------------------------------------------------------------------|
|  |                                                                                                                                                   |                                                                                                                                                                                                             | available to the spouse in case of death of a subscriber.                                                                                                                                |
|  | Old Age Pension scheme by Karnataka Building and Other Construction workers welfare board (2017) by state government of Karnataka<br><br>Pillar 3 | Workers who have paid the membership fee as a registered BOCW for five years or more and until they reach the age of 60 are eligible.                                                                       | The monthly cost per beneficiary is Rs. 1000 (USD 13.48). This benefit is slightly higher than the official poverty level in rural Karnataka and slightly lower in urban Karnataka.      |
|  | Micropensions (Eg: SEWA Bank) by self-help groups<br><br>Pillar 3                                                                                 | Contributions must be made until the age of 55, and pension benefits begin from the age of 58. Contributions to the pension system range from 50 INR (USD 0.67) to 100 INR (USD 1.35) per month per member. | The accumulated balances can be taken in a lump payment, a phased withdrawal, annuity, or a combination of these techniques at an agreed-upon retirement age (typically 58 or 60 years). |
|  | Atta Dal state scheme (2007) by state government of Punjab<br><br>Pillar 4                                                                        | Elderly poor                                                                                                                                                                                                | Provide wheat at a rate of 2INR (USD 0.027) FOR 1 Kg                                                                                                                                     |
|  | Annapurna Scheme (2000) Component of NSAP Government of India<br><br>Pillar 4                                                                     | Destitute aged 65 years and above who, though eligible, are uncovered by IGNOAPS.                                                                                                                           | Beneficiaries are supplied with 10 kgs of rice per month, free of cost, by the PDS.                                                                                                      |

|  |                                                                                                                                                    |                                                                                                                                                                                                                                                                        |                                                                                                                                                                                                                                                                          |
|--|----------------------------------------------------------------------------------------------------------------------------------------------------|------------------------------------------------------------------------------------------------------------------------------------------------------------------------------------------------------------------------------------------------------------------------|--------------------------------------------------------------------------------------------------------------------------------------------------------------------------------------------------------------------------------------------------------------------------|
|  |                                                                                                                                                    |                                                                                                                                                                                                                                                                        |                                                                                                                                                                                                                                                                          |
|  | <p>Senior Citizen's Allowance (2009) by Government of Nepal<br/>This scheme was earlier operational as Old Age Allowance –1994</p> <p>Pillar 0</p> | <p>All elderly who are 70 years of age and above, all individuals belonging to the Dalit and Karnali communities from their 60th birthday onwards</p>                                                                                                                  | <p>500 NPR (4.21USD) monthly and 1000NPR (8.42USD) to elderly above 100 years of age. The monthly benefits were subsequently increased to 1000NPR (8.42USD) in 2015, 2000NPR (16.84USD) and 3000NPR (25.25USD) in 2019<br/>NPR 2,000 + NPR 1,000 for health expenses</p> |
|  | <p>Nepal Social Pension scheme (1995) by Government of Nepal</p> <p>Pillar 0</p>                                                                   | <p>Elderly who are 70 years and above and elderly widows who are 60 years and above. Those races that are deemed as endangered by the state government, women who are either unmarried or are divorced and individuals who are either fully or partially disabled.</p> | <p>NPR 150 – NPR 500 monthly (USD 1.26 - USD 4.21)<br/>NPR 500 (USD 4.21) per month for endangered races and women who are unmarried.<br/>NPR 300 (USD 2.53) monthly to partially disabled individuals<br/>NPR 1000 (8.42 USD) to fully disabled individuals</p>         |
|  | <p>Helpless Widows Allowance (1996) by Government of Nepal</p> <p>Pillar 0</p>                                                                     | <p>All Nepalese widows who are 60 years of age and have no financial resources, those who do not get care from family members, and widows who do not receive their late husbands' pension.</p>                                                                         | <p>All widows receive a monthly pension of 100 NPR (USD 0.84)</p>                                                                                                                                                                                                        |

|                 |                                                                                                                                      |                                                                                                                                                                                                                                                                              |                                                                                                                                                                                                                                         |
|-----------------|--------------------------------------------------------------------------------------------------------------------------------------|------------------------------------------------------------------------------------------------------------------------------------------------------------------------------------------------------------------------------------------------------------------------------|-----------------------------------------------------------------------------------------------------------------------------------------------------------------------------------------------------------------------------------------|
| <b>Nepal</b>    | Allowance for disabled People (1996) by Government of Nepal<br><br>Pillar 0                                                          | Individuals who are 16 years of age and are blind, who do not have both hands or who have hands but do not work, who do not have both legs or who have legs but do not work.                                                                                                 | All disabled people receive a universal basic pension 100 NPR (USD 0.84). The ruling Nepali Congress increased the old age allowance to 150 NPR (USD 1.56) during the International Year of the Elderly Persons (1999).                 |
|                 | Government Pension Scheme by Government of Nepal<br><br>Pillar 1                                                                     | The age of eligibility varies by occupation—civil servants, army, teachers, and police officers are all eligible at different ages. For Civil servants the pensioner should complete 20 yrs in service                                                                       | Benefits are determined by the length of employment and the last wage received. Not less than 50% of basic pay to be given as pension                                                                                                   |
|                 | Jiuni – This a kind of intra-family income support for older adults. It is a common occurrence in landed households.<br><br>Pillar 4 | According to this system, the inheritance or the property is given to the offspring or any individual who looks after the senior citizen until he or she dies.                                                                                                               | Inheritance or family property                                                                                                                                                                                                          |
| <b>Pakistan</b> | Employee old age benefit institution scheme (1976) by Government of Pakistan<br><br>Pillar 2                                         | 60 years and above males, 55 years and above females working in small scale businesses. Employees can contribute a minimum of PKR 130 (USD 0.63) (at 1% of the worker's minimum wages) and a maximum of PKR 3000 (USD 18.25) every month for a mandatory period of 15 years. | The minimum pension under this scheme is PKR 8500 (~USD 41) and the maximum pension is calculated as: Average Minimum Monthly Wages x No. of years of Insurable Employment)/50                                                          |
|                 | Civil service pension by Government of Pakistan (1947 and reorganized in 1973)<br><br>Pillar 2                                       | Civil servants with a minimum of 25 years' service or or completion of 60 years of age are eligible for full pension (The minimum vesting period for pension benefits is 10 years)                                                                                           | Pensioners are eligible to commute 35 % of their gross pension at retirement, based on the commutation criteria that have been established. Post retirement pension was 4.09% per year of the basic salary to in year 2018. The minimum |

|  |                                                                                  |                                                                                                                                                                                                           |                                                                                                                                                                                                                                                                                              |
|--|----------------------------------------------------------------------------------|-----------------------------------------------------------------------------------------------------------------------------------------------------------------------------------------------------------|----------------------------------------------------------------------------------------------------------------------------------------------------------------------------------------------------------------------------------------------------------------------------------------------|
|  |                                                                                  |                                                                                                                                                                                                           | pension under this scheme is PKR 10000 (~USD 48).                                                                                                                                                                                                                                            |
|  | Voluntary Pension Scheme (2005) by Government of Pakistan<br><br>Pillar 3        | Monthly voluntary contribution by employed or self-employed individuals.                                                                                                                                  | The registered taxpayers can invest in three types of funds – Equity, Fixed income security and Money market . After retirement the accumulated amount is either given as a lump sum or as regular pension.                                                                                  |
|  | Government service pension fund (1954) by government of Pakistan<br><br>Pillar 3 | Mandatory for all government sector employees who worked for a period of 25 years                                                                                                                         | The retirees receive a pension and provident fund.                                                                                                                                                                                                                                           |
|  | Civil Pension Scheme (1947)<br><br>Pillar 2                                      | Public servants who have more than 10 years of unbroken service in a permanent and pensionable position are eligible to receive a monthly pension for the rest of their life on reaching 60 years of age. | The pension scheme grants a pension equivalent to 85-90% of the last salary drawn prior to retirement.                                                                                                                                                                                       |
|  | Public Servants Provident fund (1942)<br><br>Pillar 2                            | The program covers public servants who are not serving in permanent and pensionable posts.                                                                                                                | All pensionable public servants must make a mandatory contribution of 6% of their salary towards this scheme. At the end of each year, the government, as the employer, credits a sum equivalent to one and a half times the years' compulsory contributions, into the contributors account. |

|           |                                                                                |                                                                                                                                                                                                                                                                                                                                                                                                                                    |                                                                                                                                                                                                                                                                                                                                         |
|-----------|--------------------------------------------------------------------------------|------------------------------------------------------------------------------------------------------------------------------------------------------------------------------------------------------------------------------------------------------------------------------------------------------------------------------------------------------------------------------------------------------------------------------------|-----------------------------------------------------------------------------------------------------------------------------------------------------------------------------------------------------------------------------------------------------------------------------------------------------------------------------------------|
| Sri Lanka | Employee provident fund (1981) by Government of Sri Lanka<br><br>Pillar 2      | Employees contribute 8% of wage and employers pay 12%. The eligibility for withdrawing benefits is (1) reaching retirement age of 55 years (males) and 50 years (females), (2) retiring within three months before marriage or within 5 years after marriage, in the case of female members (3) joining pensionable employment, (4) migration, or (5) ceasing employment for the reason of permanent and total incapacity to work. | The beneficiaries receive a lump sum during the retirement. The average amount of a refund paid per member is was approximately SLR 200,000 (~USD 556) in 2010.                                                                                                                                                                         |
|           | Public sector pension scheme (2008) by Government of Sri Lanka<br><br>Pillar 2 | Civil servants who are age 55 years (men) or age 50 years (women) are eligible.                                                                                                                                                                                                                                                                                                                                                    | Benefits of the scheme depend on the salary of the individual. The pension is based on final salary (85-90% replacement after 30 years of service), is not taxable, but is not indexed for inflation. There is no explicit spousal allowance, but widows/ widowers receive a survivor's pension following the death of her/ his spouse. |

|  |                                                                                 |                                                                                                                                                                                                                                                                                                         |                                                                                                                                                                                                                                                                                                                                                                                                                                                                                                                                               |
|--|---------------------------------------------------------------------------------|---------------------------------------------------------------------------------------------------------------------------------------------------------------------------------------------------------------------------------------------------------------------------------------------------------|-----------------------------------------------------------------------------------------------------------------------------------------------------------------------------------------------------------------------------------------------------------------------------------------------------------------------------------------------------------------------------------------------------------------------------------------------------------------------------------------------------------------------------------------------|
|  | Public Welfare Assistance Allowance (Pin Padi) programme (1939)<br><br>Pillar 0 | Social support scheme for poor elderly, people living with disabilities, widows and orphans                                                                                                                                                                                                             | Monthly pension ranging from LKR 250 (USD 0.7) to LKR 500 (USD 1.4). Since 2012, the monthly pension for elderly above 70 yrs has been raised to LKR 1000 per month (USD 2.79).                                                                                                                                                                                                                                                                                                                                                               |
|  | Farmers' Pension and Social Security Benefit Scheme (1987)<br><br>Pillar 3      | Farmers aged between 18 and 59 years, whose primary source of income is agriculture, including livestock farming, and are not qualified to be enrolled in other pensions schemes are eligible. The extent of the land owned and cultivated by the enrollee and his family should be less than 10 acres. | The enrollee becomes entitled to receive a pension ranging from Rs. 1,000 (USD 13.48) to Rs. 4,166 (USD 56.20) per month upon reaching the age of 60. In case of total disablement before 60 years of age, reimbursement not exceeding Rs 50,000 (USD 674.16) and refund of accumulated contributions together with interest; alternatively, a monthly allowance from the date of permanent disablement is provided. In case of death of the pensioner, the spouse receives the pension until what would have been the pensioner's 80th year. |

|  |                                                                                                    |                                                                                                                                                                                                                                                                                                                                                                                                                |                                                                                                                                                                        |
|--|----------------------------------------------------------------------------------------------------|----------------------------------------------------------------------------------------------------------------------------------------------------------------------------------------------------------------------------------------------------------------------------------------------------------------------------------------------------------------------------------------------------------------|------------------------------------------------------------------------------------------------------------------------------------------------------------------------|
|  | <p>The Fishermen's Pension and Social Security Benefit Scheme (1990)</p> <p>Pillar 3</p>           | <p>An individual, between the ages of 18 and 59, who earns his living by fishing or fish farming, is eligible to join the scheme. The enrollee cannot own more than five acres of fish farms or three mechanized boats (combined weight should not exceed six tons). He should not be liable to pay income tax or be eligible for other pension schemes or receive a pension upon the death of his spouse.</p> | <p>Regular contributors upon reaching the age of 60, become eligible to receive a monthly pension ranging between Rs. 1,000 (USD 13.49) and Rs. 4,166 (USD 56.20)</p>  |
|  | <p>Pension and Social Security Benefit Scheme for Self-Employed Persons (1996)</p> <p>Pillar 3</p> | <p>Individuals between the ages of 18 and 59, in the category of self-employed persons specified by order of gazette are eligible to join the scheme.</p>                                                                                                                                                                                                                                                      | <p>The monthly pension benefit varies from Rs. 2,500 (USD 33.68) if the member has enrolled at the age of 18, to Rs. 500 (USD 6.74) if joined at the age of 55-59.</p> |
